# Supplementary material for: Endothelial SARS-CoV-2 infection is not the underlying cause of COVID-19-associated vascular pathology in mice
Source: PubMed Central journal article supplement (PMC10562591; doi:10.3389/fcvm.2023.1266276), 2023-09-26
Supplement: Image1.pdf [file Image1.pdf]

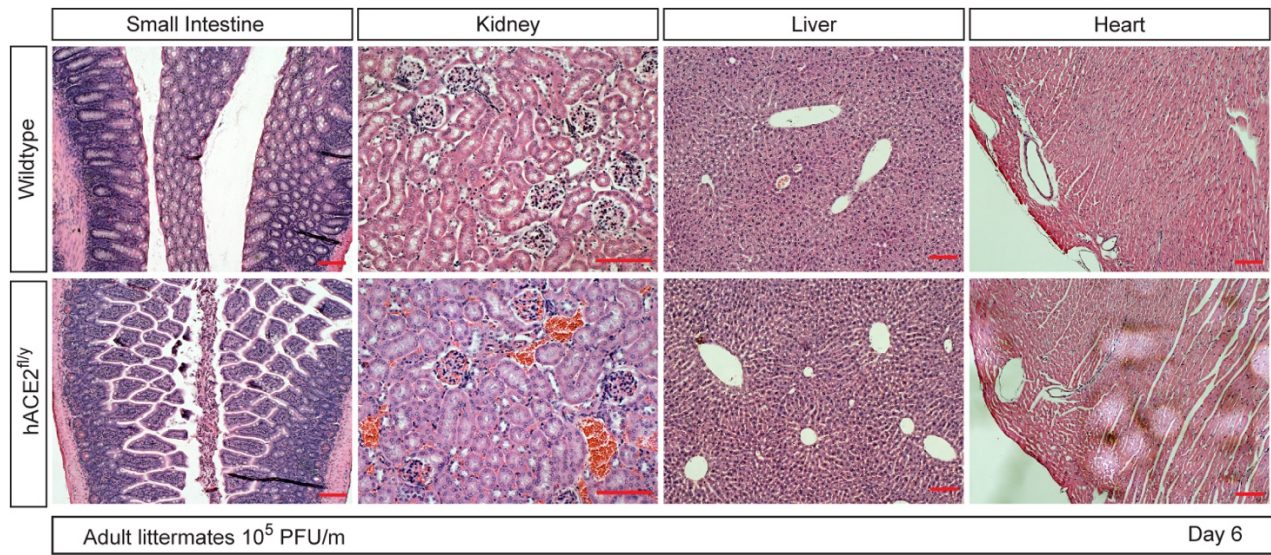

**Supplementary Figure 1.** H&E analysis of small intestine, kidney, liver, and heart from *hACE2<sup>fl/y</sup>* mice 6 days after  $10^5$  PFU of SARS-CoV-2 infection via intranasal administration. Scale bars, 100  $\mu$ m.
